# Supplementary material
Source: PubMed Central journal article supplement (PMC5682946)
Supplement: NIHMS917375-supplement-1.pdf [file NIHMS917375-supplement-1.pdf]

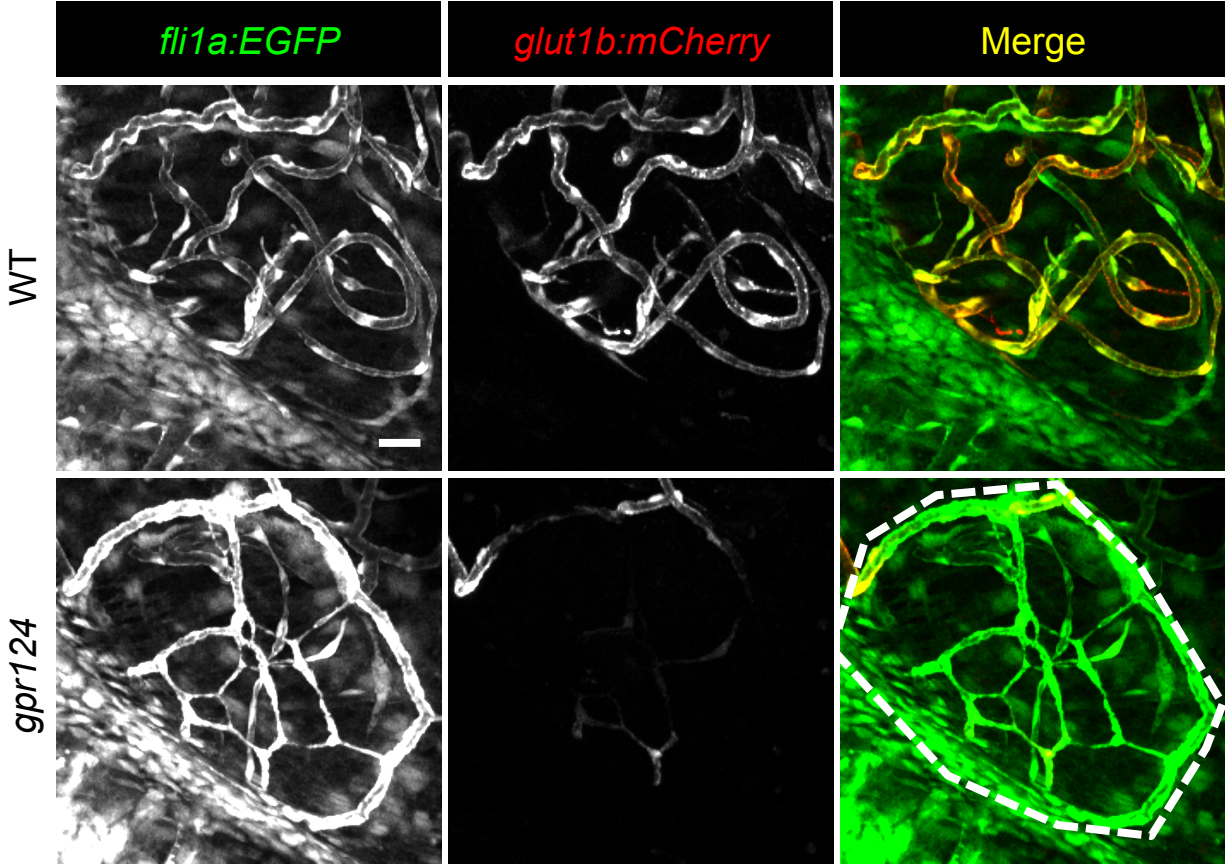

**Supplemental Figure 1.** *gpr124* mutants form abnormal vessels on the brain surface at 6 dpf. Shown here is a high magnification of the images shown in Figure 3D. Scale bar in top left image is 10  $\mu$ m for all images.
